# Supplementary material for: Ultrafine ZnCo2O4 QD-incorporated carbon nitride mediated peroxymonosulfate activation for norfloxacin oxidation: performance, mechanisms and pathways
Source: Royal Society of Chemistry journal article supplement (doi:10.1039/d3ra02364h), 2023-01-01
Supplement: d3ra02364h1.pdf [file d3ra02364h1.pdf]

## Supporting Information for

### Ultrafine ZnCo<sub>2</sub>O<sub>4</sub> QDs-incorporated carbon nitride mediated peroxymonosulfate activation for norfloxacin oxidation: performances, mechanisms and pathways

*Tao Zeng<sup>a, b, \*</sup>, Sijia Jin<sup>b</sup>, Zhiquan Jin<sup>b</sup>, Shuqi Li<sup>b, c</sup>, Rui Zou<sup>b</sup>, Xiaole Zhang<sup>d, \*</sup>, Shuang Song<sup>b</sup>, Min Liu<sup>a, \*</sup>*

<sup>a</sup> College of Architecture and Environment, Sichuan University, Sichuan 610065, China

<sup>b</sup> Key Laboratory of Microbial Technology for Industrial Pollution Control of Zhejiang Province, College of Environment, Zhejiang University of Technology, Zhejiang 310032, China

<sup>c</sup> Hangzhou Vocational & Technical College, Ecology and Health Institute, Hangzhou, Peoples R China

<sup>d</sup> College of Life Science, North China University of Science and Technology, Tangshan, 063000, Hebei, China

#### \* Corresponding Author

Tao Zeng.

Email: zengtao@zjut.edu.cn; Tel: +86-571-88320726.

Min Liu.

Email: [liuminscu@163.com](mailto:liuminscu@163.com)

Xiaole Zhang.

Email: smilxin@126.com

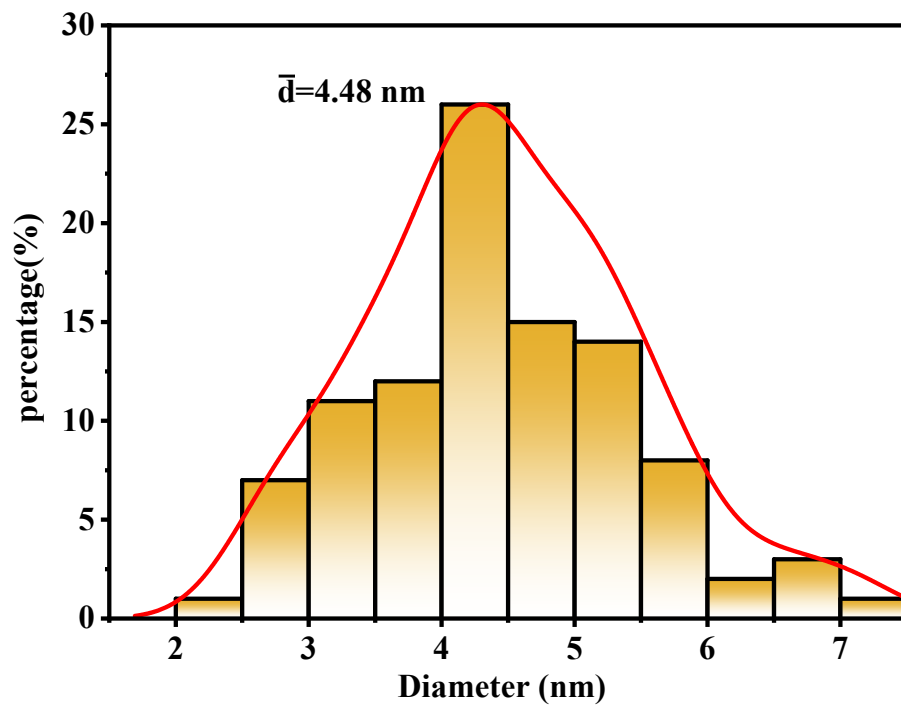

Figure S1. The histogram of ZnCo<sub>2</sub>O<sub>4</sub> Sizes.

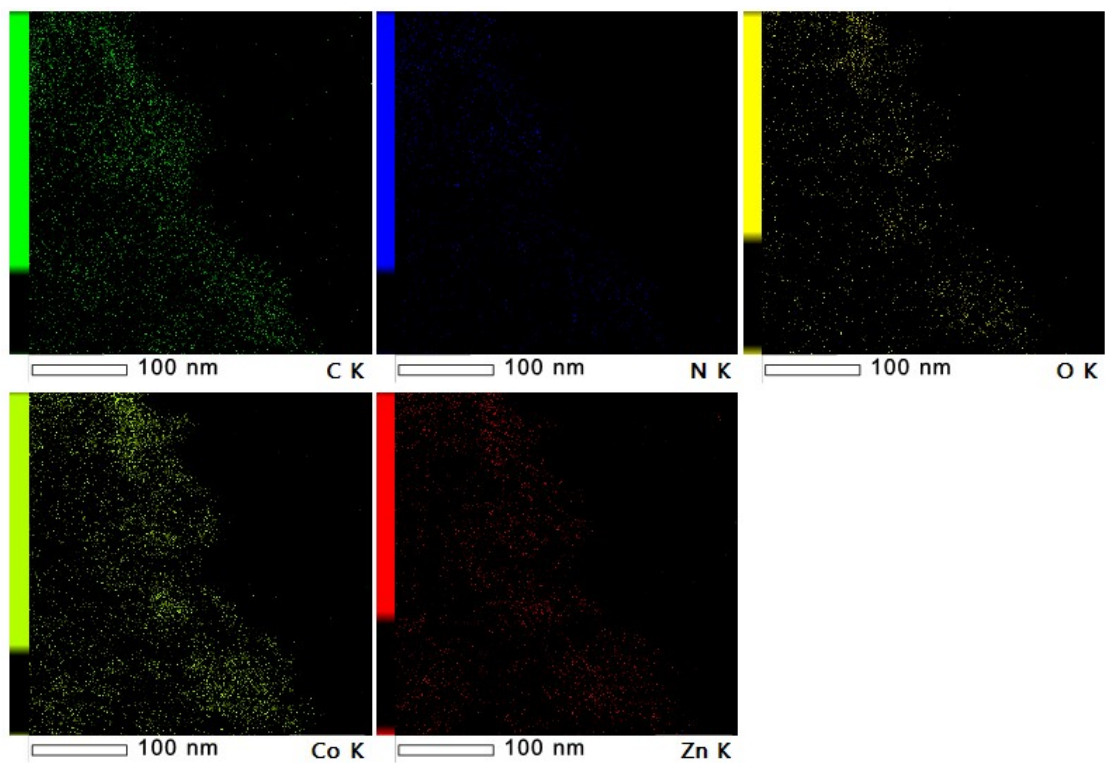

Figure S2. EDS-elemental mapping of ZnCo<sub>2</sub>O<sub>4</sub>/g-C<sub>3</sub>N<sub>4</sub>.

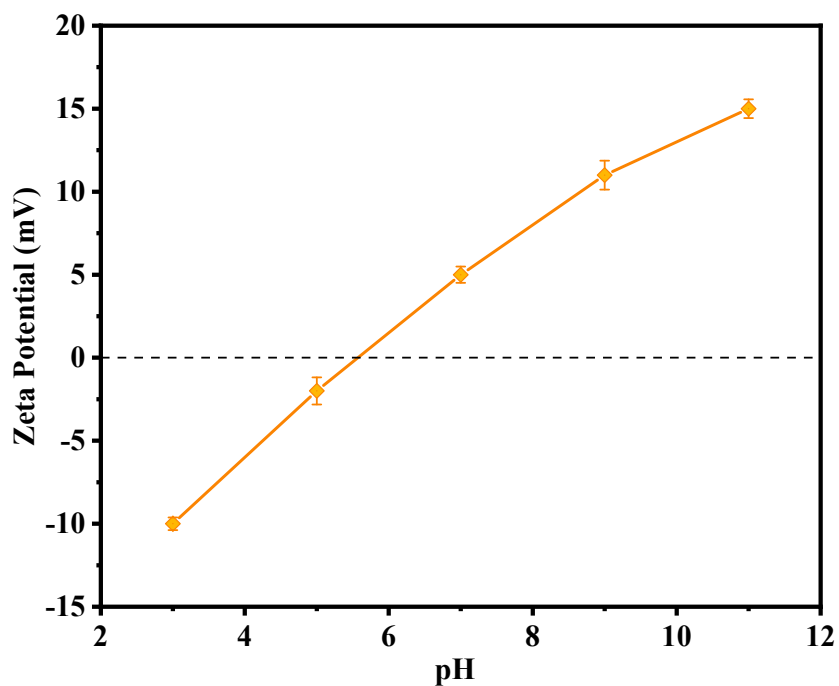

Figure S3. Zeta potential-pH profiles of  $\text{ZnCo}_2\text{O}_4/\text{g-C}_3\text{N}_4$ .

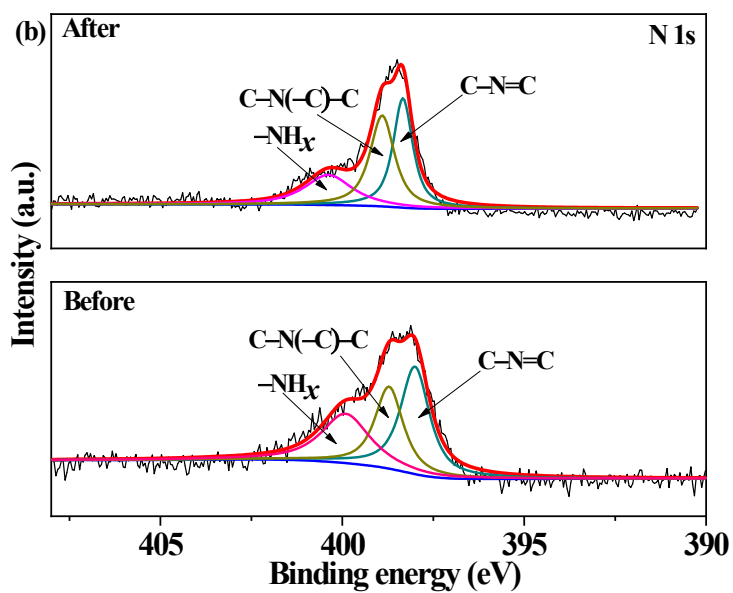

Figure S4. N 1s XPS spectrum before and after reaction

**A**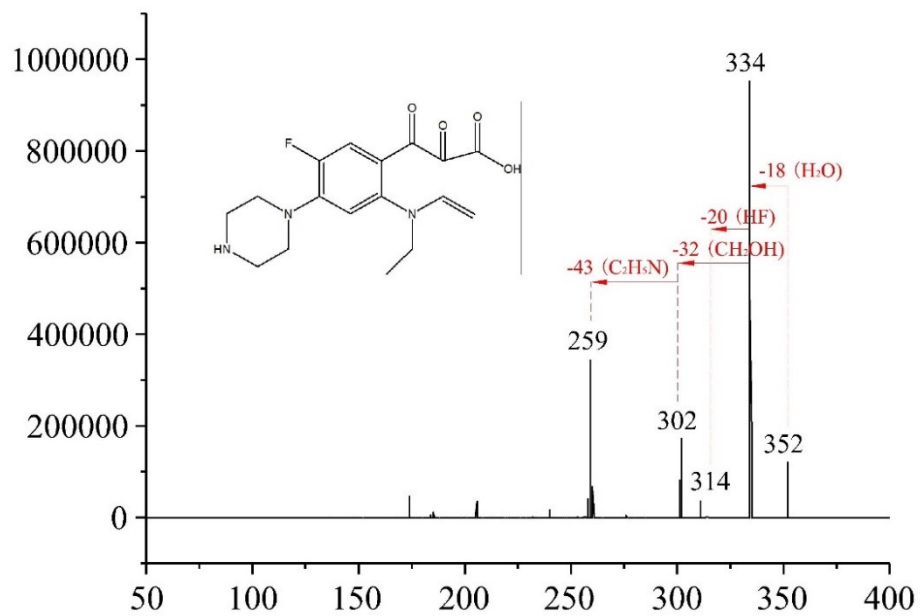**B**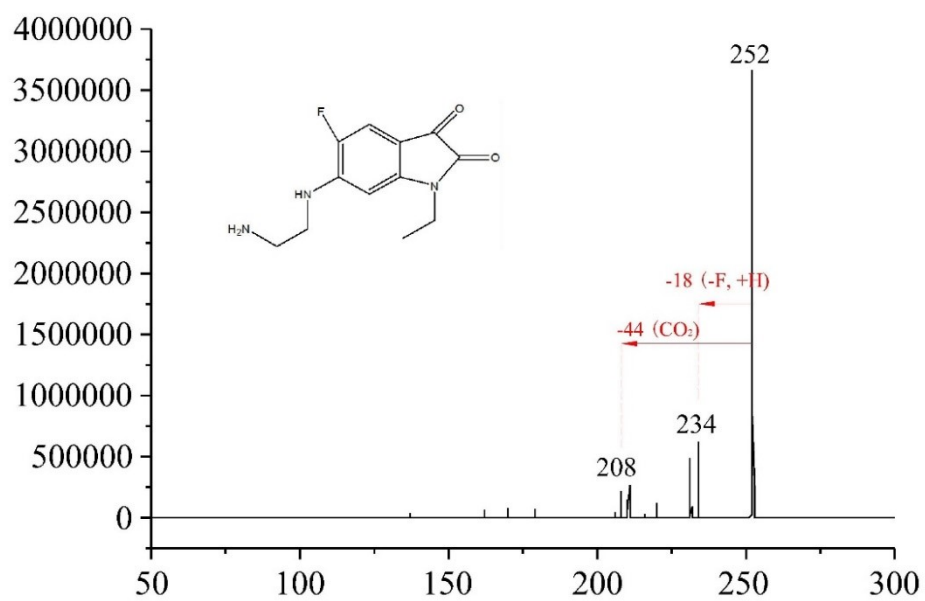

C

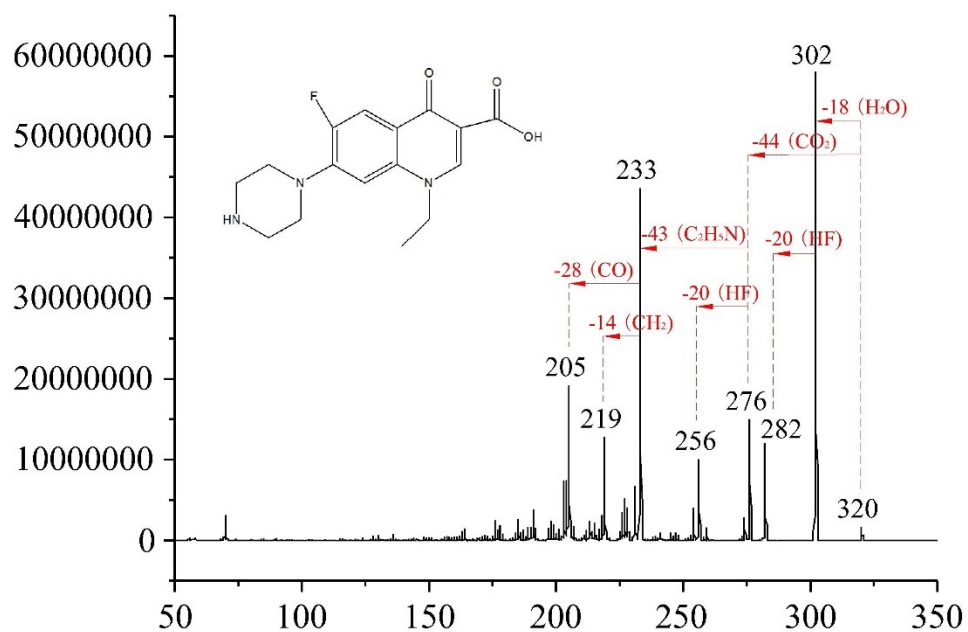

D

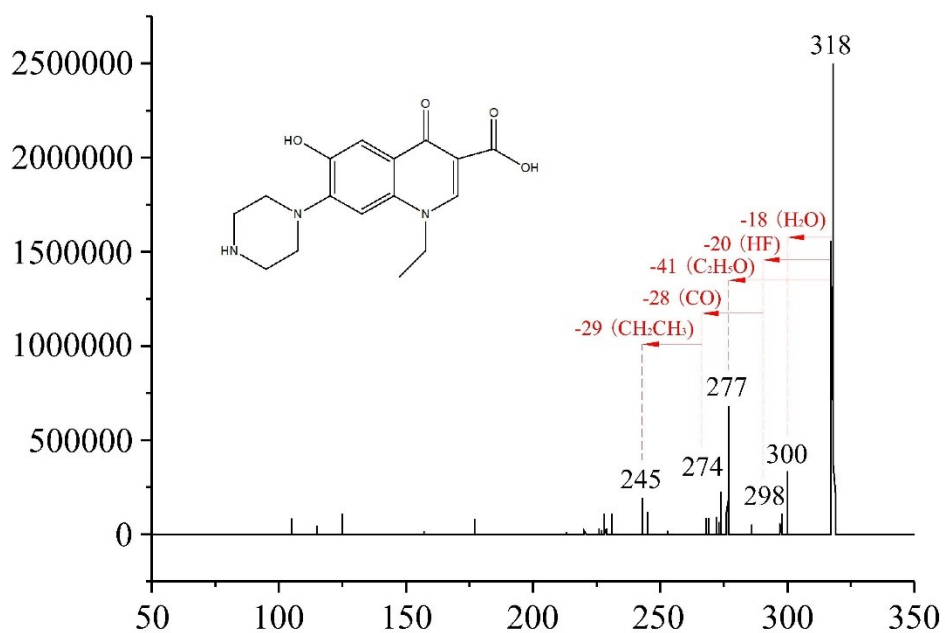

**E**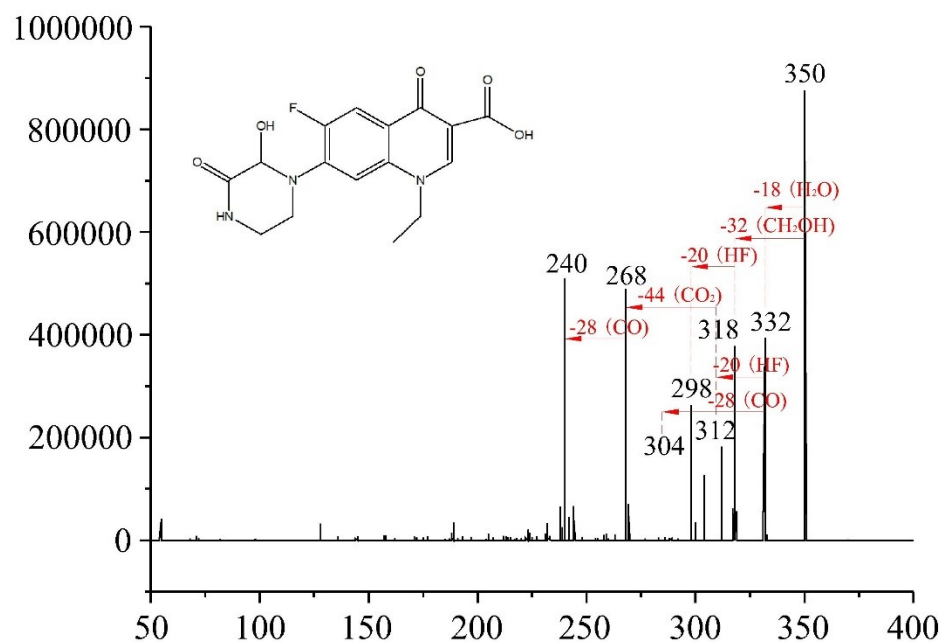**F**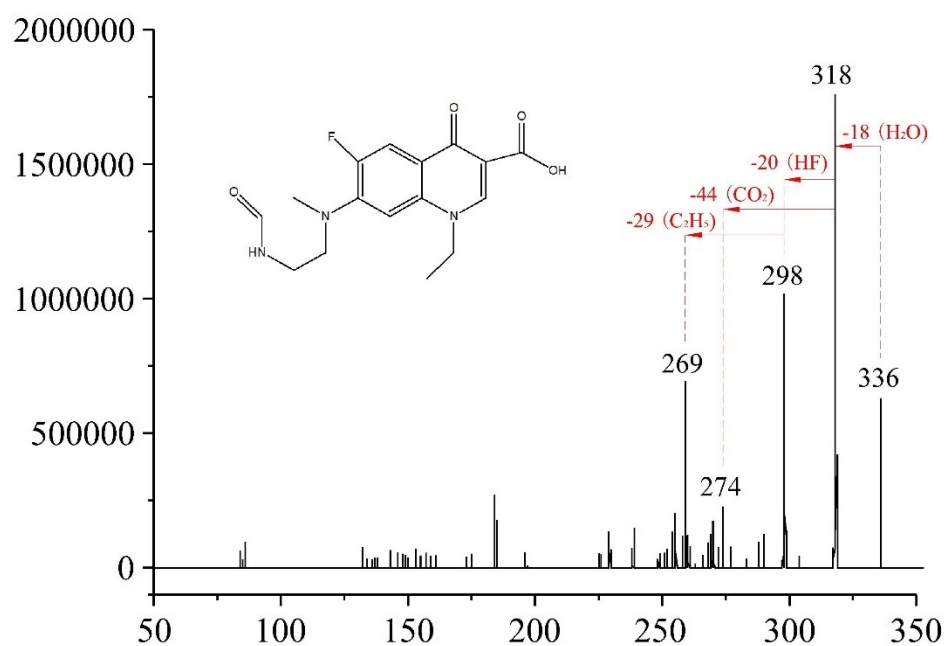

**G**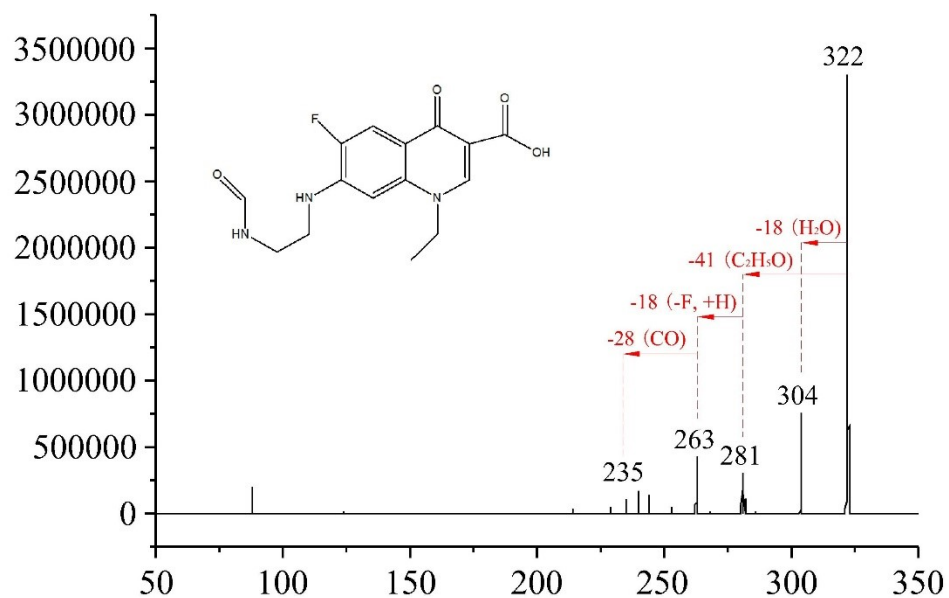**H**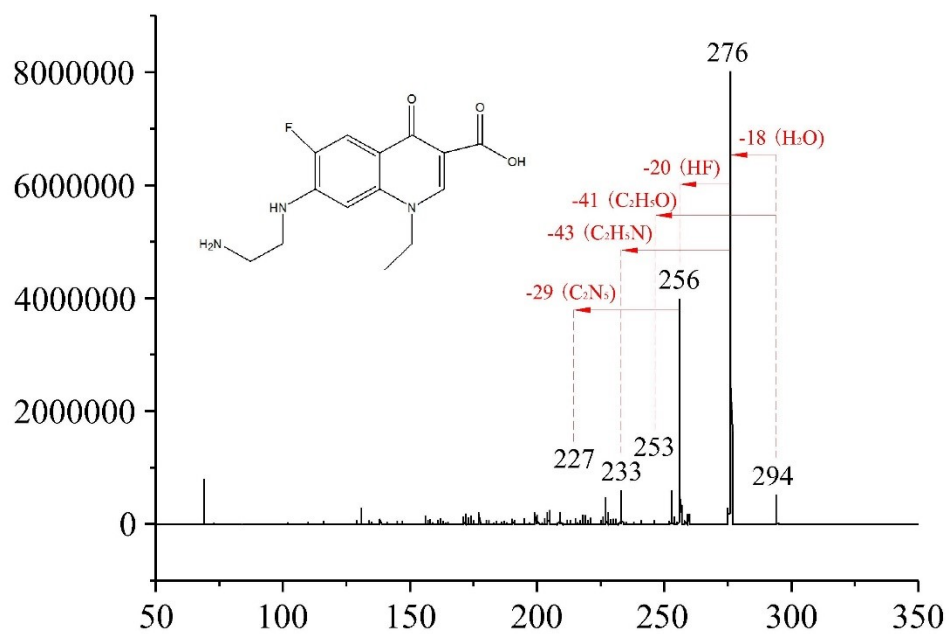

# I

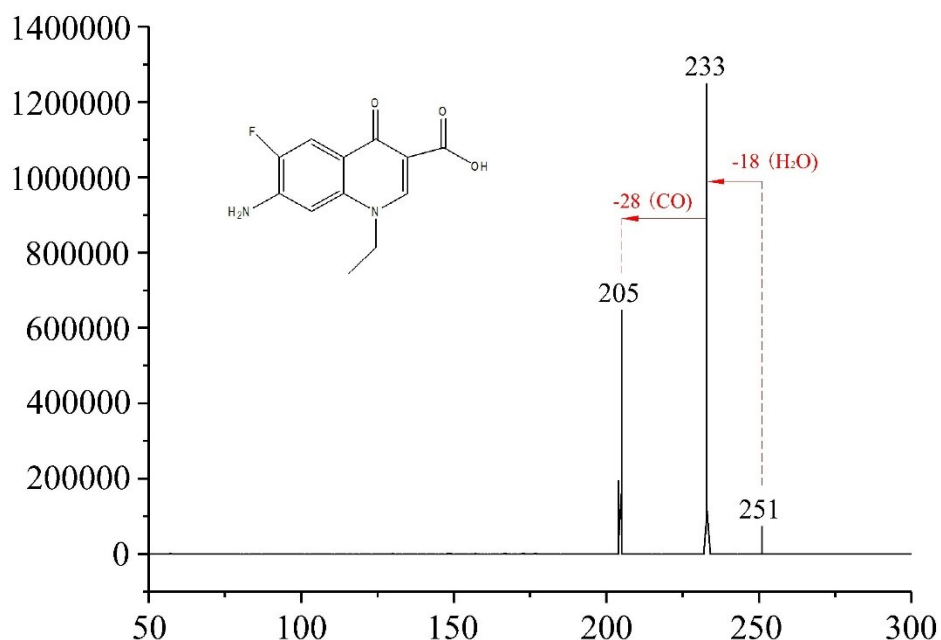

**Figure S5.** Product ion spectra of NOR (A) and its degradation intermediates (B-I) in the system of MNP/PS, which were determined using HPLC-QqQ-MS/MS, and their proposed fragmentation pathways. Experimental conditions: [NOR] = 15  $\mu$ M; [PMS] = 0.15 mM; [Catalyst] = 0.2 g/L; pH<sub>0</sub> = 4.0; T = 20  $\pm$  1  $^{\circ}$ C.

**Table S1.** Textural properties of the samples.

| Catalyst                                                          | Surface area<br>( $S_{\text{BET}} \cdot \text{m}^2 \cdot \text{g}^{-1}$ ) | 1h removal amount<br>( $\text{mmol} \cdot \text{L}^{-1}$ ) | specific activity<br>( $\text{mmol} \cdot \text{L}^{-1} \cdot \text{m}^{-2}$ ) |
|-------------------------------------------------------------------|---------------------------------------------------------------------------|------------------------------------------------------------|--------------------------------------------------------------------------------|
| <b>g-C<sub>3</sub>N<sub>4</sub></b>                               | 69.3924                                                                   | 8.3909                                                     | 0.12                                                                           |
| <b>ZnCo<sub>2</sub>O<sub>4</sub></b>                              | 82.0304                                                                   | 11.3199                                                    | 0.1380                                                                         |
| <b>ZnCo<sub>2</sub>O<sub>4</sub>/g-C<sub>3</sub>N<sub>4</sub></b> | 92.1756                                                                   | 16.6903                                                    | 0.1811                                                                         |



**Table S2.** Proposed structure of the degradation products of NX.

| No. | Molecular formula     | Measured (m/z) | Structural formula                                                                    |
|-----|-----------------------|----------------|---------------------------------------------------------------------------------------|
| 1   | $C_{17}H_{20}FN_3O_4$ | 352            | 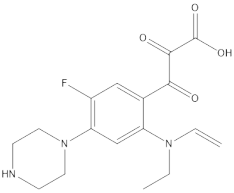   |
| 2   | $C_{12}H_{14}FN_3O_2$ | 252            |    |
| 3   | $C_{16}H_{19}N_3O_4$  | 318            |    |
| 4   | $C_{16}H_{16}FN_3O_5$ | 350            |   |
| 5   | $C_{16}H_{18}FN_3O_4$ | 336            |  |
| 6   | $C_{15}H_{16}FN_3O_4$ | 322            |  |
| 7   | $C_{14}H_{16}FN_3O_3$ | 294            |  |
| 8   | $C_{12}H_{11}FN_2O_3$ | 251            |  |
| 9   | $C_7H_5NO_4$          | 168            |  |
